# Supplementary material
Source: publisher site journal article supplement (http://www.kjim.org/upload/media/kjim-2019-063-suppl1.pdf)
Supplement: Supplementary file 1 [file kjim-2019-063-suppl1.pdf]

**Supplementary Table 1. Comparison of the baseline characteristics of the total patients with loss of follow-up and with over 1-year follow-up**

| Characteristic                               | ALL (n = 6,280) | Loss of follow-up (n = 3,767) | Over 1-yr follow-up (n = 2,513) | p value              |
|----------------------------------------------|-----------------|-------------------------------|---------------------------------|----------------------|
| Age, yr                                      | 67 ± 10         | 67 ± 10                       | 67 ± 10                         | 0.675                |
| Male sex                                     | 3,966 (63.2)    | 2,392 (63.5)                  | 1,553 (61.8)                    | 0.543                |
| BMI, kg/m <sup>2</sup>                       | 24.6 ± 3.4      | 24.5 ± 3.3                    | 24.3 ± 3.1                      | 0.224                |
| Hypertension                                 | 4,275 (67.5)    | 2,516 (64.9)                  | 1,759 (70.0)                    | 0.176                |
| Diabetes mellitus                            | 1,607 (25.4)    | 928 (24.5)                    | 679 (27.0)                      | 0.057                |
| Dyslipidemia                                 | 2,209 (34.8)    | 1,335 (35.4)                  | 874 (34.8)                      | 0.313                |
| Previous MI                                  | 213 (3.2)       | 107 (3.0)                     | 106 (4.2)                       | 0.054                |
| Previous HF                                  | 596 (12.5)      | 355 (9.7)                     | 241 (9.6)                       | 0.051                |
| Previous CKD                                 | 312 (10.0)      | 78 (9.4)                      | 234 (9.3)                       | 0.603                |
| Previous cancer                              | 631 (10.0)      | 393 (10.4)                    | 238 (9.5)                       | 0.137                |
| Previous stroke                              | 928 (14.7)      | 520 (13.8)                    | 408 (16.2)                      | 0.051                |
| Previous ECV                                 | 1,004 (15.9)    | 558 (14.8)                    | 446 (17.7)                      | < 0.001 <sup>a</sup> |
| Previous AFCA                                | 956 (15.2)      | 534 (14.1)                    | 422 (16.8)                      | < 0.001 <sup>a</sup> |
| CHA <sub>2</sub> DS <sub>2</sub> -VASC score | 2.6 ± 1.6       | 2.6 ± 1.6                     | 2.7 ± 1.6                       | 0.896                |
| HAS-BLED score                               | 1.8 ± 1.0       | 1.8 ± 1.0                     | 1.8 ± 1.0                       | 0.834                |
| Systolic BP, mmHg                            | 122 ± 15        | 122 ± 15                      | 121 ± 15                        | 0.524                |
| Diastolic BP, mmHg                           | 75 ± 11         | 75 ± 11                       | 73 ± 11                         | 0.154                |
| Heart rate, bpm                              | 75 ± 15         | 76 ± 16                       | 74 ± 15                         | 0.138                |
| LA size, mm                                  | 41 ± 7          | 41 ± 7                        | 41 ± 7                          | 0.896                |
| Ejection fraction, %                         | 61 ± 7          | 61 ± 7                        | 61 ± 7                          | 0.826                |
| Baseline AF                                  | 1,690 (26.9)    | 520 (13.8)                    | 1,170 (46.5)                    | < 0.001 <sup>a</sup> |
| Symptomatic AF                               | 3,206 (51.0)    | 2,151 (57.1)                  | 1,055 (57.8)                    | 0.507                |
| AF type                                      |                 |                               |                                 | 0.328                |
| Paroxysmal AF                                | 3,441 (54.8)    | 2,419 (64.2)                  | 1,055 (63.3)                    |                      |
| Persistent AF                                | 2,639 (42.0)    | 1,189 (31.5)                  | 1,450 (30.7)                    |                      |
| Permanent AF                                 | 107 (1.7)       | 99 (2.6)                      | 8 (5.8)                         |                      |

Values are presented as mean ± standard deviation or number (%).

BMI, body mass index; MI, myocardial infarction; HF, heart failure; CKD, chronic kidney disease; ECV, electrical cardioversion; AFCA, atrial fibrillation catheter ablation; HAS-BLED, Hypertension, Abnormal renal/liver function, Stroke, Bleeding history or predisposition, Labile international normalized ratio, Elderly, and Drugs/alcohol concomitantly; BP, blood pressure; LA, left atrium; AF, atrial fibrillation.

<sup>a</sup>Statistically significant.
